# Supplementary material
Source: publisher site journal article supplement (https://www.dovepress.com/article/373291)
Supplement: Supplementary file 1 [file get_supplementary_file.php]

**Supplementary Materials**

| **Data Source Description** | 2 |
| --- | --- |
| **eTable 1**. Database Origins and Completeness | 3 |
| **eTable 2**. Eligibility Criteria of PARSIFALTrial and Real-World Evidence Study | 4 |
| **eTable 3**. Regression Models to Estimate Imputed Values | 6 |
| **eTable 4**. Key Confounders Adjusted for in the Clinical Trial Emulation Study | 9 |
| **eTable 5**. Continuity Ratio (CR) Calculation | 10 |
| **eTable 6**. Mean Rate of Imaging Procedures and Office Visits During Follow-Up by Treatment Arm (Differential Surveillance Assessment) | 11 |
| **References** | 12 |

**Data Source Description**

The validity of real-world evidence studies is inextricably linked to the reliability and relevance of the data resource used including its provenence.1 Real-world data may be derived from a number of different sources with varying degrees of completeness (**eTable** **1**). To have utility in comparative effectiveness research (CER) of medical products, data resources must, at a minimum, contain sufficient information to ascertain treatments, outcomes, prognostic factors, and eligibility criteria, as well as be capable of establishing temporality between the treatment and outcome.2, 3 The greater the number and completeness of the data sources used to construct a healthcare database, the more likely the database is to give rise to valid inferences on treatment effectiveness.4

The data resource used in this study, the *iKnowMed* (iKM) EHR database from the US Oncology Network, draws information from structured fields in an outpatient health record system used exclusively by oncology practices (**eTable 1**).5 The database includes patient-level information on all chemotherapy and other medication orders prescribed by in-network oncologists, physician notes from encounters in the oncology practices, and molecular diagnostics. All disease state information, including tumor stage and histology, is drawn from structured fields in the health record, with a varying degree of completeness between diseases. The iKM database is limited by a lack of linkage with out-of-network records/claims and no capture of inpatient care or medical procedures (e.g., diagnostic imaging, surgery). These properties permit ascertainment of treatments and certain outcomes (e.g. time-to-next treatment) that patients are initiated on within-network (e.g., chemotherapy) with a high degree of validity. Furthermore, temporality between treatment initiation and certain outcomes can be established due to the longitudinal nature of the health records. As with any clinical database, challenges may arise in the application of certain study eligibility criteria that are based on biomarker data that might have missingness or treatment history/line-of-therapy due to the inability to observe out-of-network encounters that may have been captured before the patient began seeking care in the database network. Non-cancer related comorbidities and other confounding variables may also be challenging to capture for these reasons as well. Such comorbidities, however, can be ascertained indirectly by non-oncology medications used by the patients and recorded during medication reconciliations in unstructured outpatient notes.

**eTable 1. *iKnowMed* EHR Database Origins and Completeness**

| **Source of Clinical Information** | **Availability in iKnowMed** | **Completeness** |
| --- | --- | --- |
| Tumor registry data with NAACR standards | No | N/A |
| Structured fields in EHR indicating cancer type | Yes | High; diagnostic billing codes indicating cancer type are available and complete for all patients |
| Structured fields in EHR indicating disease state information | Yes | Moderate; stage, histology, and metastasis information are reported with a moderate degree of missingness (approx. 10%-30% missingness) |
| Outpatient claims | No | N/A |
| Inpatient claims | No | N/A |
| Pharmacy claims | No | N/A |
| Chemotherapy orders | Yes | High; chemotherapy orders from within-network physicians are complete |
| Outpatient notes | Yes | Moderate; outpatient oncology notes are completely captured from within-network encounters only |
| Inpatient notes | No | N/A |
| Procedure notes | No | N/A |
| Radiology notes | No | N/A |
| Medication orders | Yes | Moderate; medication ordering records are available and complete from within-network physicians only |
| Molecular diagnostics and laboratory data | Yes | Moderate; molecular diagnostics have a moderate degree of missingness (approx. 10%-30% missingness) |
| Capture of out-of-network encounters | No | N/A |
| Abbreviations: NAACR = North American Association of Central Cancer Registries; EHR = Electronic Health Record | | |

**eTable 2**. **Eligibility Criteria of PARSIFAL Trial and Real-World Evidence Study**

| **PARSIFAL Trial Eligibility Criteria** | **RWE Eligibility Criteria** |  |  | **Notes** |
| --- | --- | --- | --- | --- |
| Inclusion Criteria | Inclusion Criteria | n | Excluded |  |
| Age at least 18 years with Locally Advanced Breast Cancer Not Amenable to Curative Therapy | Age at least 18 years with Diagnosis of Breast Cancer | 246,752 |  |  |
| Incident Use of Palbociclib Following Date of Initial Metastasis | 9,182 | 237,570 |  |
| No Prior Chemotherapy in the Metastatic Setting | No Systemic Anti-Cancer Therapy* Following Initial Record Indicating Metastasic Disease and Prior to Index Date | 6,383 | 2,799 | Assuming that any therapies for advanced disease occurred following metastasis was recorded in the data |
| Confirmed ER+ Histology | No Records Indicating ER- Histology Prior to or on Index Date | 6,290 | 93 | Subjects only excluded if evidence for ER- (subjects were included if missing or if ER+) |
| Adequate Organ and Marrow Function, Resolution of All Toxic Effects of Prior Therapy or Surgical Procedures |  | N/A |  | This is a safety criterion for the trial and less relevant to real-world treatment setting |
| Measurable Disease as per RECIST v1.1 or Non-Measurable Disease |  | N/A |  | We are assuming that all subjects in RWD have measurable disease if they are receiving treatment |
| Postmenopausal Status |  | N/A |  | Not captured in RWD, but likely to be satisfied in RWD since this is consistent with the indication for the exposures of interest |
| Resolution of all acute toxic effects of prior anti-cancer therapy or surgical procedures to NCI-CTCAE version 4.0 Grade equal or minor than 1 |  | N/A |  | This is a safety criterion for the trial and less relevant to real-world treatment setting |
| Exclusion Criteria | Exclusion Criteria |  |  |  |
| Confirmed HER-2 Positive Disease | Confirmed Diagnosis with HER-2 Positive Disease | 6,086 | 204 |  |
| Known Uncontrolled or Symptomatic CNS Metastases | Record of CNS Metastases Prior to Index Date | 6,046 | 40 |  |
| Prior (neo)adjuvant endocrine therapy with DFI <=12 Months from Completion of Treatment | Treatment with letrozole or anastrozole <=12 Months from index date | 3,647 | 2,399 |  |
|  | Prior Treatment with any CDK 4/6 inhibitor (ribociclib, palbociclib, abemaciclib) | 3,325 | 322 |  |

**eTable 2** (continued)

| **PARSIFAL Trial Eligibility Criteria** | **RWE Eligibility Criteria** | **n** | **Excluded** | **Notes** |
| --- | --- | --- | --- | --- |
| ECOG >2 | ECOG >2 or Karnofsky <50 | 3,295 | 30 | Subjects only excluded if evidence of ECOG > 2 (or equivalent Karnofsky <50, if ECOG unavailable). Subjects with missing performance status were included. Eligibility criteria in trial excluded subjects with ECOG>1, however, there were subjects included with an ECOG>1 per PARSIFAL manuscript |
|  | Received Palbociclib without Letrozole or Fulvestrant | 1,908 | 1,387 |  |
|  | Male Gender | 1,886 | 22 |  |
| Major surgery within 4 weeks of start of study drug |  | N/A |  | This is a safety criterion for the trial and less relevant to real-world treatment setting |
| Patients with an active, bleeding diathesis |  | N/A |  | This is a safety criterion for the trial and less relevant to real-world treatment setting |
| Serious concomitant systemic disorder incompatible with the study |  | N/A |  | This is a safety criterion for the trial and less relevant to real-world treatment setting |
| Known hypersensitivity to letrozole, fulvestrant or any of their excipients, or to any palbociclib excipients |  | N/A |  | This is a safety criterion for the trial and less relevant to real-world treatment setting |
| Are unable to swallow tablets |  | N/A |  | This is a safety criterion for the trial and less relevant to real-world treatment setting |
| QTc > 480 msec on basal assessments, personal history of long or short QT syndrome, Brugada syndrome or known history of QTc prolongation, or Torsade de Pointes |  | N/A |  | This is a safety criterion for the trial and less relevant to real-world treatment setting |
| Uncontrolled electrolyte disorders that can compound the effects of a QTc-prolonging drug |  | N/A |  | This is a safety criterion for the trial and less relevant to real-world treatment setting |
| Patients with rapidly progressive visceral disease or visceral crisis |  | N/A |  | This is a safety criterion for the trial and less relevant to real-world treatment setting |
| Locally advanced breast cancer candidate for a radical treatment |  | N/A |  | This is a safety criterion for the trial and less relevant to real-world treatment setting |
| Chronic daily treatment with corticosteroids with a dose of at least 10 mg/day methylprednisolone equivalent |  | N/A |  | This is a safety criterion for the trial and less relevant to real-world treatment setting; Dosing is also not available for non-onco treatments |

eTable 3. Regression Models to Estimate Imputed Values

| **Variable with Missingness** | **Imputation Method** | **Model** | **Additional Information** |
| --- | --- | --- | --- |
| Body Mass Index | Predictive Mean Matching |  | Each case with a missing BMI value was matched with 5 non-missing values with the closest predicted BMIs. |
| Tumor Stage | Ordered Logistic Regression |  | Where  j=1 when stage 1,  j=2 when stage 2, j=3 when stage 3, j=4 when stage 4 |

**eTable 3** (continued)

| **Variable with Missingness** | **Imputation Method Used** | **Model** | **Additional Information** |
| --- | --- | --- | --- |
| Performance Status | Ordered Logistic Regression |  | Where  j=0 when performance status is 0,  j=1 when performance status is 1  j=2 when performance status is 2 |
| Number of Metastatic Sites | Ordered Logistic Regression |  | Where  j=1 when number of metastatic sites is 1,  j=2 when number of metastatic sites is 2, j=3 when number of metastatic sites is 3, j=4 when number of metastatic sites is 4 or greater |

**eTable 3** (continued)

| **Variable with Missingness** | **Imputation Method Used** | **Model** | **Additional Information** |
| --- | --- | --- | --- |
| Smoking Status | Multinomial Logistic Regression |  | Where  j=1 when smoking status is former,  j=2 when smoking status is never,  j=3 when smoking status is other |

**eTable 4. Key Confounders Adjusted for in Primary Analysis (Multivariable Cox Regression Model)**

| **Variable Name** | **Definition** | **Operationalization** |
| --- | --- | --- |
| Age Category | Age at index date, grouped into 6 categories | Categorical: 25-44, 45-54, 55-64, 65-74, 75-84, and 85+ |
| Family History | Family history of cancer | Binary: Yes/No |
| Performance Status | ECOG performance status or equivalent Karnofsky Score at index date | Categorical: 0 (ECOG 0 or Karnofsky 100), 1 (ECOG 1 or Karnofsky 80-90) |
| Tumor Stage | Tumor Stage | Categorical: I, II, III, IV |
| Time Since Initial Diagnosis | Number of years between cohort entry and initial breast cancer diagnosis | Ordinal: 0-35 years (1-year increments) |
| Visceral Disease | Cancer spread to visceral tissue (i.e., adrenal gland, bronchus, cervical, cervix, digestive, fallopian, gastrointestinal, genital, intestine, leptomeninges, liver, lung, mediastinum, omentum, orbit, respiratory, urinary, ovary, pancreas, peritoneum, pleura, rectum, retroperitoneum, uterus | Binary: Yes/No |
| Non-Visceral Disease | Cancer spread to non-visceral tissue (i.e., bone, chest, lymph nodes, spleen, skin) | Binary: Yes/No |
| Newly Diagnosed | If initial diagnosis was within 7 days of first metastasis record | Binary: Yes/No |
| Disease-Free Interval | Time between last treatment prior to first record of metastasis and date of initial metastasis; if no treatment present prior to metastasis then classified as “newly metastatic” | Categorical: ≤12 months, >12 months, newly metastatic |
| Number of Metastatic Sites | Number of distinct tissues in which disease has spread | Categorical: 1, 2, 3, 4+ |
| Osteoporosis Medications | Physician ordering of osteoporosis medicines in year prior to index date | Binary: Yes/No |
| Antihypertensive Medications | Physician ordering of antihypertensive medicines in year prior to index date | Binary: Yes/No |
| Anemia History | History of anemia in year prior to index date | Binary: Yes/No |
| Cardiovascular Disease History | History of cardiovascular disease in year prior to index date | Binary: Yes/No |
| Osteoporosis History | History of osteoporosis in year prior to index date | Binary: Yes/No |
| Smoking History | Most recent smoking history on or before index date | Categorical: Current, Former, Never, Other |
| Body Mass Index | Most recent body mass index recorded on or before index date | Continuous |
| Region | Geographic region in the United States | Categorical: Midwest, South, Northeast, West |

**eTable 5**. **Continuity Ratio (CR) Calculation**

| **Factor** | **Contribution to CR if Factor Present** |
| --- | --- |
| (Intercept) | 0.02 |
| BMI recorded | 0.07 |
| At least 1 diagnosis | 0.01 |
| At least 2 diagnoses | 0.05 |
| At least 1 OP visit | 0.05 |
| At least 2 OP visits | 0.05 |
| At least 1 med | 0.05 |
| At least 2 meds | 0.13 |
| At least 1 basic fact | 0.14 |
| At least 2 basic facts | 0.21 |
| Influenza or Pneumococcal vaccine | 0.16 |
| CR = Sum of All Factors Present During the 1-Year Baseline Period | |

**eTable 6. Mean Rate of Imaging Procedures and Office Visits During Follow-Up by Treatment Arm (Differential Surveillance Assessment)**

| **Radiologic Imaging Procedures** | | | |
| --- | --- | --- | --- |
| **Treatment Group** | **N** | **%N Missinga** | **Mean Number of Imaging Procedures per Patient-Day** |
| Letrozole Only | 120 | 95% | 0.027 |
| Palbociclib and Letrozole | 157 | 88% | 0.012 |
| **Office Visits** | | | |
| **Treatment Group** | **N** | **%N Missing** | **Mean Encountersb per Patient-Day** |
| Letrozole Only | 2411 | 5% | 0.287 |
| Palbociclib and Letrozole | 1292 | 1% | 0.122 |
| a Imaging data was missing and/or incomplete for the vast majority of patients b Proxied by vitals (blood pressure/pulse) recordings | | | |

**REFERENCES**

1. Hershman DL, Wright JD. Comparative effectiveness research in oncology methodology: observational data. J Clin Oncol. 2012;30(34):4215-22. Epub 2012/10/17. doi: 10.1200/JCO.2012.41.6701. PubMed PMID: 23071228.

2. Schneeweiss S, Patorno E. Conducting Real-world Evidence Studies on the Clinical Outcomes of Diabetes Treatments. Endocr Rev. 2021;42(5):658-90. Epub 2021/03/13. doi: 10.1210/endrev/bnab007. PubMed PMID: 33710268; PubMed Central PMCID: PMCPMC8476933.

3. Huybrechts K, Schneeweiss S. Secondary Data. In: Modern Epidemiology, 4th edition, pp. 247-262, by Rothman K, Lash T, Greenland S, VanderWeele T (Eds.), Wolters Kluwer, Philadelphia, PA, 2021.

4. Schaumberg DA, McDonald L, Shah S, Stokes M, Nordstrom BL, Ramagopalan SV. Evaluation of comparative effectiveness research: a practical tool. J Comp Eff Res. 2018;7(5):503-15. Epub 2018/02/22. doi: 10.2217/cer-2018-0007. PubMed PMID: 29463115.

5. EHR for Oncology Practices | Ontada 2021 [December 23, 2021]. Available from: <https://www.ontada.com/Providers-Solutions/iKnowMed/>.
